1 **Title:**

2

3 **Analysis of differentially methylated regions in primates and non-primates**

4 **provides support for the evolutionary hypothesis of schizophrenia**

5

6 Niladri Banerjee<sup>a,b</sup>, Tatiana Polushina<sup>a,b</sup>, Francesco Bettella<sup>c,d</sup>,

7 Vidar M. Steen<sup>a,b</sup>, Ole A. Andreassen<sup>c,d</sup>, Stephanie Le Hellard<sup>a,b</sup>

8

9 a. NORMENT - K.G. Jebsen Center for Psychosis Research, Department of Clinical

10 Science, University of Bergen, Bergen, Norway

11 b. Dr. Einar Martens Research Group for Biological Psychiatry, Department of

12 Medical Genetics, Haukeland University Hospital, Bergen, Norway

13 c. NORMENT - K.G. Jebsen Center for Psychosis Research, Institute of Clinical

14 Medicine, University of Oslo, Oslo, Norway

15 d. NORMENT - K.G. Jebsen Centre, Division of Mental Health and Addiction, Oslo

16 University Hospital, Oslo, Norway

17

18 **Correspondence to:** Prof. Stéphanie Le Hellard, Department of Clinical Medicine,

19 Laboratory Building, Haukeland University Hospital, N-5021 Bergen, Norway.

20 **Telephone:** +47-55 97 53 37

21 **Fax:** +47-55 97 54 79

22 **Email:** stephanie.hellard@uib.no

23

24 **Authors' email addresses**

25 Niladri Banerjee

niladri.banerjee@uib.no

|    |                      |                                    |
|----|----------------------|------------------------------------|
| 26 | Tatiana Polushina    | tatiana.polushina@uib.no           |
| 27 | Francesco Bettella   | francesco.bettella@medisin.uio.no  |
| 28 | Vidar M. Steen       | vidar.martin.steen@helse-bergen.no |
| 29 | Ole A. Andreassen    | o.a.andreassen@medisin.uio.no      |
| 30 | Stéphanie Le Hellard | stephanie.hellard@uib.no           |
| 31 |                      |                                    |
| 32 |                      |                                    |

33 **Abstract**

34

35 Introduction: The persistence of schizophrenia in human populations separated by  
36 geography and time led to the evolutionary hypothesis that proposes schizophrenia as  
37 a by-product of the higher cognitive abilities of modern humans. To explore this  
38 hypothesis, we used here an evolutionary epigenetics approach building on  
39 differentially methylated regions (DMRs) of the genome.

40 Methods: We implemented a polygenic enrichment testing pipeline using the  
41 summary statistics of genome-wide association studies (GWAS) of schizophrenia and  
42 12 other phenotypes. We investigated the enrichment of association of these traits  
43 across genomic regions with variable methylation between modern humans and great  
44 apes (orangutans, chimpanzees and gorillas; primate DMRs) and between modern  
45 humans and recently extinct hominids (Neanderthals and Denisovans; non-primate  
46 DMRs).

47 Results: Regions that are hypo-methylated in humans compared to great apes show  
48 enrichment of association with schizophrenia only if the major histocompatibility  
49 complex (MHC) region is included. With the MHC region removed from the analysis,  
50 only a modest enrichment for SNPs of low effect persists. The INRICH pipeline  
51 confirms this finding after rigorous permutation and bootstrapping procedures.

52

53 Conclusion: The analyses of regions with differential methylation changes in humans  
54 and great apes do not provide compelling evidence of enrichment of association with  
55 schizophrenia, in contrast to our previous findings on more recent methylation  
56 differences between modern humans, Neanderthals and Denisovans. Our results

57 further support the evolutionary hypothesis of schizophrenia and indicate that the  
58 origin of some of the genetic susceptibility factors of schizophrenia may lie in recent  
59 human evolution.

60

61

62 **Key Words:** schizophrenia; evolutionary hypothesis; epigenetics; differentially  
63 methylated regions; primates; Neanderthals.

64

65

66

67

68

69

70

71

72 **1. Introduction**

73

74 Schizophrenia is a psychiatric disorder with a prevalence rate of 2.7-8.3/1,000 persons  
75 (Messias et al., 2007) and heritability estimated between 60-90% (Cardno et al., 1999;  
76 Lichtenstein et al., 2009; Skre et al., 1993; Sullivan et al., 2003). It occurs at quite  
77 similar rates across populations worldwide (Ayuso-Mateos, 2002; Brüne, 2004;  
78 WHO, 1973) and written records describing its symptoms exist dating back 5,000  
79 years (Jeste et al., 1985). This consistent persistence of the disease despite reduced  
80 fecundity (Brüne, 2004; Nichols, 2009) and increased mortality is a paradox (Bassett  
81 et al., 1996; Brown, 1997; Larson and Nyman, 1973), since the reduced fecundity of  
82 patients afflicted with schizophrenia does not appear to eliminate the disease from the  
83 population (Power et al., 2013) Part of the reason may be due to afflicted individuals  
84 reproducing prior to the onset of the disease (Markow, 2012). Another contributing  
85 factor could be that schizophrenia risk variants may have provided an advantage to  
86 the kin of the affected by conferring superior creative and intellectual abilities upon  
87 them (Kyaga et al., 2011; Nichols, 2009). To explain the constant occurrence of the  
88 disease, TJ Crow (Crow, 1997, 1995) proposed the so-called evolutionary hypothesis  
89 of schizophrenia, which suggests that the disease is a consequence of human  
90 evolution: the higher cognitive abilities of modern-day humans, including language,  
91 may predispose to psychiatric illnesses such as schizophrenia (Crow, 2008, 2000,  
92 1997).

93

94 In the post-genomic era (Lander et al., 2001; Venter et al., 2001), emerging lines of  
95 evidence are lending support to this hypothesis. Crespi et al. (Crespi et al., 2007) were  
96 amongst the first to show that genes with evidence of recent positive selection in

97 humans are also implicated more frequently in schizophrenia. More evidence has  
98 been provided by studies based on comparative genomics (Pollard et al., 2006;  
99 Srinivasan et al., 2015; Xu et al., 2015), a field in which genomes of progressively  
100 older species are compared to identify substitutions and mutations that help estimate  
101 divergence between the species. For instance, a group of regions defined by negative  
102 Neanderthal selective sweep (NSS) scores describe the selective evolution of genomic  
103 regions in modern-day humans over Neanderthals (Burbano et al., 2010; Green et al.,  
104 2010). These regions were shown by Srinivasan et al. (2015) to be enriched for  
105 schizophrenia risk markers, in line with the evolutionary hypothesis of schizophrenia.  
106 Other regions known as human accelerated regions (HARs) (Gittelman et al., 2015;  
107 Pollard et al., 2006; Xu et al., 2015), first described by Pollard et al. (2006), show  
108 accelerated evolution in humans compared to primates or mammals. HARs have also  
109 provided some evidence of enrichment of association with schizophrenia (Xu et al.,  
110 2015), but these findings may have been driven by a few genes since they were not  
111 replicated using a polygenic approach (Srinivasan et al., 2017, 2015) .

112

113 While several studies have looked at the evolution of the genome (Bird et al., 2007;  
114 Bush and Lahn, 2008; Gittelman et al., 2015; Paaby and Rockman, 2014; Pollard et  
115 al., 2006), there are reports that the epigenome is evolving as well (Gokhman et al.,  
116 2014; Hernando-Herraez et al., 2015, 2013; Mendizabal et al., 2014; Molaro et al.,  
117 2011). This provides new insights into events leading to the speciation and divergence  
118 of modern humans. The epigenome refers to the layer of chemical modifications, such  
119 as methylation and histone modifications, to the genome that regulate gene expression  
120 (Bernstein et al., 2007; Kundaje et al., 2015; Rivera and Ren, 2013). For instance,  
121 Gokhman et al. (2014) compared the methylomes of humans with Neanderthals and

122 Denisovans. They reported that while 97% of the methylome was comparable  
123 between humans, Neanderthals and Denisovans, some regions showed differential  
124 methylation between the three hominids. Previously (Banerjee et al., 2017), we  
125 analysed the differentially methylated regions (DMRs) identified for Neanderthals,  
126 Denisovans and modern humans by Gokhman et al. (2014), and found evidence that  
127 the regions of the genome with human-specific DMRs harbour relatively more genetic  
128 variants associated with schizophrenia than the rest of the genome, i.e. the DMRs  
129 were enriched for SCZ markers both at the single-nucleotide polymorphism (SNP)  
130 level and at the gene level. These human-specific DMRs thus provide evidence of  
131 enrichment of methylation changes in regions harbouring genetic variants associated  
132 with schizophrenia, at least since the divergence from Neanderthals and Denisovans  
133 (Banerjee et al., 2017).

134

135 Here, we sought to determine if evolutionarily older methylation differences can  
136 provide a further timeframe for the origin of schizophrenia risk markers in the human  
137 lineage. We asked whether we can find epigenetic evidence that the origin of  
138 schizophrenia risk markers predates the origins of the Homo genus, i.e. before the  
139 divergence of chimpanzees and humans around 6-8 million years ago (MYA) (Glazko  
140 and Nei, 2003; Langergraber et al., 2012). We tested this hypothesis by analysing  
141 primate DMRs that trace an evolutionary history of at least 13 million years (Glazko  
142 and Nei, 2003; Hasegawa et al., 1985; Rannala and Yang, 2003). We used the same  
143 statistical analyses as described by Lee et al. (2012), Schork et al. (2013), and  
144 Srinivasan et al. (2015) to test for polygenic enrichment of a set of markers from  
145 genome-wide association studies (GWAS). We interrogated regions of the human  
146 genome which are hypo- or hyper-methylated in comparison to the corresponding

147 ones in chimpanzees, gorillas and orangutans for enrichment of genetic variants

148 associated with schizophrenia or other human traits.

149



150 **2. Materials and methods**

151

152 *2.1. GWAS data*

153 Summary statistics for thirteen different phenotypes were obtained from their  
154 respective published GWAS studies: schizophrenia (SCZ) (Ripke et al., 2014), bipolar  
155 disorder (BPD) (Sklar et al., 2011), attention deficit hyperactivity disorder (ADHD)  
156 (Demontis et al., 2017), rheumatoid arthritis (RA) (Stahl et al., 2010), blood lipid  
157 markers (high density lipoprotein (HDL), low density lipoprotein (LDL), triglycerides  
158 (TG), total cholesterol (TC)) (Teslovich et al., 2010), blood pressure (systolic blood  
159 pressure (SBP), diastolic blood pressure (DBP)) (Ehret et al., 2011), body mass index  
160 (BMI) (Locke et al., 2015), height (Wood et al., 2014) and intelligence (Sniekers et  
161 al., 2017). For studies published with hg18 coordinates (BPD, SBP, DBP, HDL, LDL,  
162 TG, TC, RA), conversion to hg19 was performed using the command line version of  
163 the liftOver tool from the UCSC Genome Browser (Karolchik et al., 2014)  
164 ([http://hgdownload.cse.ucsc.edu/downloads.html#utilities\\_downloads](http://hgdownload.cse.ucsc.edu/downloads.html#utilities_downloads)). For BMI and  
165 height SNPs, the genomic coordinates were obtained by mapping them to the  
166 assembly of 1,000 Genomes Project (1KGP) Phase 1 reference panel SNPs (Durbin et  
167 al., 2012).

168

169 *2.2. Human hypo- and hyper-methylated regions from primate DMRs*

170 These methylated regions were retrieved from the study by Hernando-Herraez et al.  
171 (2015), who identified them by comparing the methylation profile of DNA from  
172 peripheral blood samples of orangutans, chimpanzees and gorillas to that of humans.  
173 Since the DMRs are determined by comparing humans with other primates, we refer  
174 to this set collectively as primate DMRs. Both hypo- and hyper-methylated DMRs

175 from humans were analysed. As these DMRs are identified in the same tissues in all  
176 samples, they are considered to represent species-specific methylation differences, not  
177 tissue-specific methylation differences (Gokhman et al., 2014). Altogether, the human  
178 hypo- and hyper-methylated DMRs can be used to represent an evolutionary course of  
179 history spanning from at least 13 MYA (Glazko and Nei, 2003; Langergraber et al.,  
180 2012), when orangutans diverged from the common ancestors, to 6 MYA, when the  
181 chimpanzees and humans diverged from each other (Glazko and Nei, 2003;  
182 Langergraber et al., 2012). Since our interest was in human-specific enrichment, we  
183 focused the analyses on human hypo- and hyper-methylated DMRs.

184

### 185 *2.3. Differentially methylated regions (DMRs) from Neanderthals, Denisovans and* 186 *modern humans*

187 As previously described (Gokhman et al., 2014), these methylated regions have been  
188 identified by comparing the methylomes of osteoblasts from modern-day humans  
189 with those from Neanderthals and Denisovans. We refer to them in this paper as non-  
190 primate DMRs. Gokhman et al. (2014) devised a strategy utilizing information in the  
191 form of cytosine (C) to thymine (T) ratios to decipher the ancient methylomes of  
192 Neanderthals and Denisovans. Subsequently, they compared the methylomes of  
193 Neanderthals, Denisovans and modern humans and inferred the species in which the  
194 methylation variation likely took place; this information was used to classify the  
195 DMRs as Neanderthal-specific, Denisovan-specific and human-specific. These DMRs  
196 represent species-specific methylation (Gokhman et al., 2014).

197

### 198 *2.4. Neanderthal selective sweep (NSS) data*

199 We obtained NSS marker data from Srinivasan et al. (2015). Negative scores for NSS  
200 markers indicate positive selection in humans. Markers with such scores were used in  
201 the downstream analyses.

202

### 203 *2.5. SNP assignment with LDsnpr*

204 The previously published R-based software package LDsnpr (Christoforou et al.,  
205 2012) was utilized for assigning SNPs to the respective DMRs using LD (linkage  
206 disequilibrium)-based binning at  $r^2 \geq 0.8$  in R (R Core Team, 2017). LD-based binning  
207 makes it possible to determine whether SNPs from a specific GWAS are in LD with  
208 the DMR of interest. Using LD allows the capture of a greater number of relevant  
209 SNPs in comparison to an approach where only physically overlapping SNPs are  
210 considered. The LD file utilized was in HDF5 format and was constructed from the  
211 European reference population of 1KGP and can be publicly downloaded at:  
212 <http://services.cbu.uib.no/software/ldsnpr/Download>.

213

### 214 *2.6. Enrichment analyses based on stratified quantile-quantile (QQ) plots*

215 QQ plots are an essential method used in GWASs to depict the presence of true  
216 signals. They help to visually observe the spread of data and deviations from the null  
217 distribution. Under the null hypothesis, no difference is expected between the  
218 observed and expected distributions of data. As such, a line of no difference or null  
219 line is obtained that is equidistant from both X and Y axes. However, if the null  
220 hypothesis were to be false, there would be a deviation of the observed data  
221 distribution from the expected data distribution. As described in depth by Schork et al.  
222 (2013), a leftward deflection of the observed distribution from the null line represents  
223 enrichment – the greater the leftward deflection, the stronger the enrichment of true

224 signals. This method has been used recently not only to show how specific genomic  
225 annotation affects the distribution of disease SNPs with true signals (Schork et al.,  
226 2013), but also to demonstrate that regions of recent evolution are enriched for  
227 schizophrenia markers (Banerjee et al., 2017; Srinivasan et al., 2015). We took the  
228 SNPs that are in LD with the DMR regions and plotted their  $p$ -value distributions  
229 from various GWASs. The observed  $p$ -value distributions were then determined to be  
230 enriched or not using conditional Q-Q plots as described by Schork et al. (2013).  
231 Genomic inflation was corrected by  $\lambda_{GC}$ .

232

### 233 *2.7. INRICH-based enrichment analysis*

234 The stratified QQ plots provide a visual depiction of data distributions and enrichment  
235 of true signals within a stratum of data, but they do not quantify this enrichment.  
236 Therefore, we used the INterval EnRICHment (INRICH) analysis tool to statistically  
237 quantify the enrichment observed. This pipeline performs permutation and  
238 bootstrapping procedures to determine with statistical confidence whether LD-  
239 implicated genomic intervals are enriched in specific gene sets (Lee et al., 2012). The  
240 INRICH analysis takes into account several potential biases that can otherwise lead to  
241 false positives, such as variable gene size, SNP density within genes, LD between and  
242 within genes, and overlapping genes in the gene sets. We used the same procedure  
243 reported previously (Banerjee et al., 2017; Xu et al., 2015) with SNPs in the extended  
244 MHC region and SNPs with MAF  $<0.05$  excluded from the analysis. Additional  
245 details can be found in the Supplementary Information.

246

## 247 **3. Results**

248

249 *3.1. Co-localisation of human hypo-methylated regions and genetic variants*

250 *associated with schizophrenia in the MHC.*

251 We ascertained whether there is any enrichment of human hypo- and hyper-  
252 methylated regions in schizophrenia-associated SNPs. Using previously published  
253 methodology (Christoforou et al., 2012), we mapped schizophrenia markers to human  
254 hypo-methylated regions (hypo-DMRs) and hyper-methylated regions (hyper-DMRs).  
255 Out of a total of ~9.4 million SCZ markers obtained from the GWAS, 10,165 markers  
256 tagged hypo-DMRs and 4,503 tagged hyper-DMRs.

257

258 Figure 1A shows the conditional QQ plots for schizophrenia markers (all markers, the  
259 hypo-DMR set and the hyper-DMR set) including those in the MHC region. For  
260 hypo-DMR markers (Supplementary Dataset 1), we observed a significant enrichment  
261 as depicted by the leftward deviation. No enrichment was observed for hyper-DMR  
262 markers. Since the MHC region is a region of extended linkage disequilibrium, which  
263 can bias the enrichment estimates, and since it is the main region of association with  
264 schizophrenia, we also tested the enrichment with the MHC region removed (Figure  
265 1B). Under these conditions there is a trend for enrichment of hypo-DMR markers at  
266 higher  $p$ -value thresholds, but this enrichment is substantially less than when the  
267 MHC is included (Figure 1A).

268

269 *3.2. Enrichment of markers is not seen for other human traits*

270 Next, we tested if the human hypo- and hyper-methylated regions are enriched for  
271 other human traits and phenotypes. We tested a total of thirteen different phenotypes,  
272 full details of which can be found in section 2.1. Each GWAS had been performed  
273 with a different number of genotyped SNPs, and this difference could potentially bias

274 our results. To circumvent this, we created a list of ~2.4 million common SNPs that  
275 were genotyped across all the phenotypes investigated in the present study. Only  
276 SNPs on this list were used for enrichment analysis.

277

278 As can be seen in Fig. 2, no enrichment was observed in any of the traits, with the  
279 possible exception of height at higher  $p$ -value threshold markers. The common list of  
280 markers did not contain the MHC region and as such no enrichment is observed for  
281 schizophrenia either.

282

283 *3.3. Evidence of enrichment for hypo-methylated regions with SNPs at high  $p$ -values*

284 The enrichment plots allowed us to visually ascertain enrichment in the datasets.

285 However, they did not give any indication of the statistical robustness of the

286 enrichment. To ascertain if the human hypo- and hyper-methylated regions are

287 statistically enriched for schizophrenia and height markers, we implemented the

288 INRICH pipeline, which performs 10,000 permutations and 5,000 bootstrapping

289 calculations, to determine with statistical confidence the enrichment observed (Lee et

290 al., 2012).

291

292 The INRICH analysis confirmed a significant ( $p < 0.05$ ) enrichment of association for

293 human hypo-DMRs, but not hyper-DMRs, with schizophrenia at SNPs of higher  $p$ -

294 value thresholds ( $p < 10e-3$  to  $p < 10e-4$ ) (Fig. 3). This enrichment was at the gene level,

295 and complemented the enrichment observed at the SNP level for higher  $p$ -value

296 thresholds (Fig. 1B). Importantly, this enrichment persisted upon testing a pruned

297 schizophrenia dataset (Supplementary Fig. 1). The enrichment was however not

298 significant at the genome-wide threshold ( $p < 5 \times 10e-8$ ) and was much weaker than that

299 observed for non-primate DMRs (Fig. 3). We also observed a similar trend for height  
300 where there was enrichment at SNPs of higher but not lower  $p$ -value thresholds. This  
301 enrichment was similarly less pronounced than for non-primate DMRs  
302 (Supplementary Fig. 2).

303

304

#### 305 **4. Discussion**

306

307 In our study, we investigated if regions of the human genome whose methylation has  
308 evolved since the divergence of modern humans from great apes are enriched for  
309 markers of schizophrenia. We found evidence that there is enrichment for hypo-  
310 methylated DMRs driven by the MHC locus, a known risk region that harbours the  
311 most significant schizophrenia GWAS markers (Ripke et al., 2014). When the MHC  
312 region was excluded from the analysis, there remained a trend towards enrichment of  
313 hypo-DMRs driven by SNPs of higher  $p$ -value thresholds. This finding was  
314 complemented by the INRICH analyses that indicated significant enrichment among  
315 SNPs of higher  $p$ -value thresholds. When analysing a global SNP list common to  
316 GWAS of several traits, we failed to find evidence of enrichment of any trait with the  
317 possible exception of height at higher SNP  $p$ -value thresholds. We tested this further  
318 with the INRICH pipeline, which revealed gene-level enrichment of LD intervals for  
319 height markers below the genome-wide threshold ( $p < 5 \times 10^{-8}$ ). Compared to our  
320 previous study, in which we demonstrated enrichment of association with  
321 schizophrenia for non-primate DMRs that were derived by comparing human,  
322 Neanderthal and Denisovan methylomes (Banerjee et al., 2017), the primate DMRs  
323 tested here show far less enrichment. The primate and non-primate DMRs have very

324 little overlap, which suggests that the methylation changes that took place since the  
325 divergence of modern humans from Neanderthals and Denisovans occurred in  
326 different regions of the genome compared to those that took place since divergence  
327 from great apes.  
328  
329 The central role of the MHC region in the enrichment of human hypo-methylated  
330 regions poses interesting questions. The MHC region is known for its complex LD  
331 architecture, which renders the interpretation of genetic signals very challenging.  
332 Other groups have previously reported that the MHC region is one of the fastest  
333 evolving regions of the human genome (Meyer et al., 2017) and have implicated it in  
334 mate preference (Bernatchez and Landry, 2003; Kromer et al., 2016; Potts and  
335 Wakeland, 1990; Roberts et al., 2008; Winternitz et al., 2017), odour perception  
336 (Roberts et al., 2008; Santos et al., 2005) and immune response (Benacerraf, 1981;  
337 Horton et al., 2004). Recently it was shown that a large proportion of the association  
338 of the region with schizophrenia can be explained by complement C4 haplotypes that  
339 include C4 copy number variation (Sekar et al., 2016). Nevertheless, there remains a  
340 part of the association in this region that is unexplained (Gejman et al., 2011) and will  
341 need further investigation. It is interesting to consider the possibility that the MHC  
342 region and the immune system in general play a central role in evolution at the  
343 epigenomic as well as at the genomic level (Meyer et al., 2017; Potts and Wakeland,  
344 1990; Sommer, 2005; Traherne, 2008). The mechanisms by which hypo-methylation  
345 could influence the aforementioned processes are open to speculation since the MHC  
346 region has more than 200 genes in close physical proximity and LD with one another  
347 (Beck et al., 1999). This makes it hard to interpret the exact biological consequences  
348 of our findings.



349

350 Interestingly, the gene-level analysis via INRICH seems to suggest enrichment of  
351 SNPs of higher  $p$ -value thresholds in primate DMRs for both schizophrenia and  
352 height. This enrichment is far lower than what we found for non-primate DMRs for  
353 both schizophrenia and height (Banerjee et al., 2017) and which persisted for  
354 schizophrenia even with pruned datasets.

355

356 The very small overlap between primate and non-primate DMRs might suggest that  
357 the divergence from Neanderthals and Denisovans brought about more significant  
358 methylation changes in regions implicated in the aetiology of schizophrenia and  
359 height than the divergence from great apes. In other words, our results might suggest  
360 that the evolutionary factors that regulate methylation variation acted on different  
361 segments of the genome at different time points. So while the methylation variation  
362 since the divergence from Neanderthals and Denisovans may mark a genome-wide  
363 increase of schizophrenia susceptibility (Banerjee et al., 2017), the methylation  
364 variation from the time period between 13 and 6 MYA appears not to have  
365 significantly increased the risk for schizophrenia (except possibly for some markers in  
366 the MHC region),

367

368 Our results are also in line with the findings of Srinivasan et al. (2017), who failed to  
369 find evidence of enrichment of schizophrenia using genomic markers of evolution  
370 dating back to 200 MYA. The same authors also reported enrichment of association  
371 for regions of more recent evolution in modern humans (Srinivasan et al., 2015).  
372 Interestingly, one of the evolutionary proxies used by Srinivasan and colleagues  
373 (2017), namely HARs, also showed enrichment for height, similar to our recent study

374 (Banerjee et al., 2017). This suggests that regions controlling both genomic and  
375 epigenomic variation in height may also be driven by recent evolution. Finally, our  
376 results agree well with the observation by Srinivasan et al. (2017) of some  
377 involvement of the MHC in an early evolutionary context.

378

379 Although our results are in line with several findings in the field, the current methods  
380 have some limitations. Highly polygenic traits such as schizophrenia have a large  
381 number of genetic loci contributing to the aetiology of a disease (Bulik-Sullivan et al.,  
382 2015; Schork et al., 2016). The ability to detect these large numbers of genetic loci is  
383 dependent on the sample size and adequate statistical power (Schork et al., 2016).  
384 Consequently, the polygenic enrichment methods may be limited by the statistical  
385 power of the respective GWAS and trait polygenicity. Furthermore, in the INRICH  
386 analysis that uses LD-clumping of SNPs at  $p < 10e-3$  to  $p < 10e-8$ , higher  $p$ -value  
387 thresholds (e.g.  $p < 10e-3$ ) still include SNPs of lower  $p$ -values, even though they  
388 become progressively smaller minorities. Thus, although higher  $p$ -values increase the  
389 number of LD-clumps tested, we do not expect this to increase the Type I error rate  
390 (Lee et al., 2012).

391

392 In conclusion, our results suggest that methylation markers tracing an evolutionary  
393 period dating back to 13 MYA (primate DMRs) are not enriched for schizophrenia  
394 markers, unlike methylation markers from a recent timeframe (non-primate DMRs)  
395 (Banerjee et al., 2017). Taken in consideration with previous studies of genomic  
396 markers of evolution dating back 200 MYA (Srinivasan et al., 2017), our results  
397 support the hypothesis that the origins of schizophrenia lie in more recent

398 evolutionary events, possibly after the divergence of modern-day humans from

399 Neanderthals and Denisovans.

400

401

402 **Appendix A. Supplementary data**

403 Supplementary Information: Additional Methods, Figures and Tables

404 Supplementary Dataset 1: Annotation of human hypo-methylated regions with

405 markers of schizophrenia

406

407 **References**

408

409 Ayuso-Mateos, J.L., 2002. Global Burden of schizophrenia in the year 2000-Version  
410 1 Estimates. World Health Organization.

411

412 Banerjee, N., Polushina, T., Bettella, F., Giddaluru, S., Steen, V.M., Andreassen,  
413 O.A., Le Hellard, S., 2017. Human-specific methylated regions are enriched in  
414 schizophrenia. bioRxiv 113175.

415

416 Bassett, A.S., Bury, A., Hodgkinson, K.A., Honer, W.G., 1996. Reproductive fitness  
417 in familial schizophrenia. *Schizophr. Res.* 21, 151–60.

418

419 Beck, S., Geraghty, D., Inoko, H., Rowen, L., 1999. Complete sequence and gene  
420 map of a human major histocompatibility complex. *Nature* 401, 921–923.

421

422 Benacerraf, B., 1981. Role of MHC gene products in immune regulation. *Science*  
423 212, 1229–1238.

424

425 Bernatchez, L., Landry, C., 2003. MHC studies in nonmodel vertebrates: what have  
426 we learned about natural selection in 15 years? *J. Evol. Biol.* 16, 363–77.

427

428 Bernstein, B.E., Meissner, A., Lander, E.S., 2007. The mammalian epigenome. *Cell*  
429 128, 669 – 681.

430

431 Bird, C.P., Stranger, B.E., Liu, M., Thomas, D.J., Ingle, C.E., Beazley, C., Miller, W.,  
432 Hurles, M.E., Dermitzakis, E.T., 2007. Fast-evolving noncoding sequences in the  
433 human genome. *Genome Biol.* 8, R118.

434

435 Brown, S., 1997. Excess mortality of schizophrenia. A meta-analysis. *Br. J.*  
436 *Psychiatry* 171, 502–508.

437

438 Brüne, M., 2004. Schizophrenia—an evolutionary enigma? *Neurosci. Biobehav. Rev.*  
439 28, 41–53.

440

441 Bulik-Sullivan, B.K., Loh, P.-R., Finucane, H.K., Ripke, S., Yang, J., Patterson, N.,  
442 Daly, M.J., Price, A.L., Neale, B.M., Schizophrenia Working Group of the  
443 Psychiatric Genomics Consortium, 2015. LD Score regression distinguishes  
444 confounding from polygenicity in genome-wide association studies. *Nature Genet.*  
445 47, 291.

446

447 Burbano, H.A., Hodges, E., Green, R.E., Briggs, A.W., Krause, J., Meyer, M., Good,  
448 J.M., Maricic, T., Johnson, P.L.F., Xuan, Z., Rooks, M., Bhattacharjee, A.,  
449 Brizuela, L., Albert, F.W., de la Rasilla, M., Fortea, J., Rosas, A., Lachmann, M.,  
450 Hannon, G.J., Pääbo, S., 2010. Targeted investigation of the Neandertal genome by  
451 array-based sequence capture. *Science* 328, 723–5.

452

- 453 Bush, E.C., Lahn, B.T., 2008. A genome-wide screen for noncoding elements  
454 important in primate evolution. *BMC Evol. Biol.* 8, 17.  
455
- 456 Cardno, A.G., Marshall, E.J., Coid, B., Macdonald, A.M., Ribchester, T.R., Davies,  
457 N.J., Venturi, P., Jones, L.A., Lewis, S.W., Sham, P.C., et al., 1999. Heritability  
458 estimates for psychotic disorders: the Maudsley twin psychosis series. *Arch. Gen.*  
459 *Psychiatry* 56, 162–168.  
460
- 461 Christoforou, A., Dondrup, M., Mattingsdal, M., Mattheisen, M., Giddaluru, S.,  
462 Nøthen, M.M., Rietschel, M., Cichon, S., Djurovic, S., Andreassen, O.A., et al.,  
463 2012. Linkage-disequilibrium-based binning affects the interpretation of GWASs.  
464 *Am. J. Hum. Genet.* 90, 727–733.  
465
- 466 Crespi, B., Summers, K., Dorus, S., 2007. Adaptive evolution of genes underlying  
467 schizophrenia. *Proc. Roy. Soc. Lond. [Biol]* 274, 2801–2810.  
468
- 469 Crow, T.J., 1995. A Darwinian approach to the origins of psychosis. *Br. J. Psychiatry*  
470 167, 12–25.  
471
- 472 Crow, T.J., 1997. Is schizophrenia the price that Homo sapiens pays for language?  
473 *Schizophr. Res.* 28, 127–41.  
474
- 475 Crow, T.J., 2000. Schizophrenia as the price that Homo sapiens pays for language: a  
476 resolution of the central paradox in the origin of the species. *Brain Research*  
477 *Reviews* 31, 118–129.  
478
- 479 Crow, T.J., 2008. The “big bang” theory of the origin of psychosis and the faculty of  
480 language. *Schizophr. Res.* 102, 31–52.  
481
- 482 Demontis, D., Walters, R.K., Martin, J., Mattheisen, M., Als, T.D., Agerbo, E.,  
483 Belliveau, R., Bybjerg-Grauholm, J., Bækved-Hansen, M., Cerrato, F., et al., 2017.  
484 Discovery of the first genome-wide significant risk loci for ADHD. *bioRxiv*  
485 145581.  
486
- 487 Durbin, R., Abecasis, G., Bentley, D., Chakravarti, A., Clark, A., Donnelly, P.,  
488 Eichler, E., Flicek, P., Gabriel, S., Gibbs, R., et al., 2012. An integrated map of  
489 genetic variation from 1,092 human genomes. *Nature* 497, 56–65.  
490
- 491 Ehret, G.B., Munroe, P.B., Rice, K.M., Bochud, M., Johnson, A.D., Chasman, D.I.,  
492 Smith, A.V., Tobin, M.D., Verwoert, G.C., Hwang, S.-J., et al., 2011. Genetic  
493 variants in novel pathways influence blood pressure and cardiovascular disease  
494 risk. *Nature* 478, 103.  
495
- 496 Gejman, P.V., Sanders, A.R., Kendler, K.S., 2011. Genetics of schizophrenia: new  
497 findings and challenges. *Annu. Rev. Genomics Hum. Genet.* 12, 121–44.  
498
- 499 Gittelman, R.M., Hun, E., Ay, F., Madeoy, J., Pennacchio, L., Noble, W.S., Hawkins,  
500 R.D., Akey, J.M., 2015. Comprehensive identification and analysis of human  
501 accelerated regulatory DNA. *Genome Res.* 25, 1245–1255.  
502

- 503 Glazko, G.V., Nei, M., 2003. Estimation of divergence times for major lineages of  
504 primate species. *Mol. Biol. Evol.* 20, 424–34.  
505
- 506 Gokhman, D., Lavi, E., Prüfer, K., Fraga, M.F., Riancho, J.A., Kelso, J., Pääbo, S.,  
507 Meshorer, E., Carmel, L., 2014. Reconstructing the DNA methylation maps of the  
508 Neandertal and the Denisovan. *Science* 344, 523–527.  
509
- 510 Green, R.E., Krause, J., Briggs, A.W., Maricic, T., Stenzel, U., Kircher, M., Patterson,  
511 N., Li, H., Zhai, W., Fritz, M.H.-Y., et al., 2010. A draft sequence of the  
512 Neandertal genome. *Science* 328, 710–722.  
513
- 514 Hasegawa, M., Kishino, H., Yano, T., 1985. Dating of the human-ape splitting by a  
515 molecular clock of mitochondrial DNA. *J. Mol. Evol.* 22, 160–74.  
516
- 517 Hernando-Herraez, I., Heyn, H., Fernandez-Callejo, M., Vidal, E., Fernandez-Bellon,  
518 H., Prado-Martinez, J., Sharp, A.J., Esteller, M., Marques-Bonet, T., 2015. The  
519 interplay between DNA methylation and sequence divergence in recent human  
520 evolution. *Nucleic Acids Res.* 43, 8204–8214.  
521
- 522 Hernando-Herraez, I., Prado-Martinez, J., Garg, P., Fernandez-Callejo, M., Heyn, H.,  
523 Hvilsom, C., Navarro, A., Esteller, M., Sharp, A.J., Marques-Bonet, T., 2013.  
524 Dynamics of DNA methylation in recent human and great ape evolution. *PLoS*  
525 *Genet* 9, e1003763.  
526
- 527 Horton, R., Wilming, L., Rand, V., Lovering, R.C., Bruford, E.A., Khodiyar, V.K.,  
528 Lush, M.J., Povey, S., Talbot Jr, C.C., Wright, M.W., et al., 2004. Gene map of the  
529 extended human MHC. *Nat. Rev. Genet.* 5, 889-899.  
530
- 531 Jeste, D.V., Del Carmen, R., Lohr, J.B., Wyatt, R.J., 1985. Did schizophrenia exist  
532 before the eighteenth century? *Compr. Psychiatry* 26, 493–503.  
533
- 534 Karolchik, D., Barber, G.P., Casper, J., Clawson, H., Cline, M.S., Diekhans, M.,  
535 Dreszer, T.R., Fujita, P.A., Guruvadoo, L., Haeussler, M., Harte, R.A., Heitner, S.,  
536 Hinrichs, A.S., Learned, K., Lee, B.T., Li, C.H., Raney, B.J., Rhead, B.,  
537 Rosenbloom, K.R., Sloan, C.A., Speir, M.L., Zweig, A.S., Haussler, D., Kuhn,  
538 R.M., Kent, W.J., 2014. The UCSC Genome Browser database: 2014 update.  
539 *Nucleic Acids Res.* 42, D764–70.  
540
- 541 Kromer, J., Hummel, T., Pietrowski, D., Giani, A., Sauter, J., Ehninger, G., Schmidt,  
542 A., Croy, I., 2016. Influence of HLA on human partnership and sexual satisfaction.  
543 *Scientific Reports* 6, 32550.  
544
- 545 Kundaje, A., Meuleman, W., Ernst, J., Bilenky, M., Yen, A., Heravi-Moussavi, A.,  
546 Kheradpour, P., Zhang, Z., Wang, J., Ziller, M.J., et al., 2015. Integrative analysis  
547 of 111 reference human epigenomes. *Nature* 518, 317–330.  
548
- 549 Kyaga, S., Lichtenstein, P., Boman, M., Hultman, C., Långström, N., Landén, M.,  
550 2011. Creativity and mental disorder: family study of 300 000 people with severe  
551 mental disorder. *Brit. J. Psych.* 199, 373–379.  
552

- 553 Lander, E.S., Linton, L.M., Birren, B., Nusbaum, C., Zody, M.C., Baldwin, J., Devon,  
554 K., Dewar, K., Doyle, M., FitzHugh, W., et al., 2001. Initial sequencing and  
555 analysis of the human genome. *Nature* 409, 860-921.  
556
- 557 Langergraber, K.E., Prüfer, K., Rowney, C., Boesch, C., Crockford, C., Fawcett, K.,  
558 Inoue, E., Inoue-Muruyama, M., Mitani, J.C., Muller, M.N., Robbins, M.M.,  
559 Schubert, G., Stoinski, T.S., Viola, B., Watts, D., Wittig, R.M., Wrangham, R.W.,  
560 Zuberbühler, K., Pääbo, S., Vigilant, L., 2012. Generation times in wild  
561 chimpanzees and gorillas suggest earlier divergence times in great ape and human  
562 evolution. *Proc. Natl. Acad. Sci. U.S.A.* 109, 15716–15721.  
563
- 564 Larson, C.A., Nyman, G.E., 1973. Differential fertility in schizophrenia. *Acta*  
565 *Psychiatr Scand* 49, 272–80.  
566
- 567 Lee, P.H., O’Dushlaine, C., Thomas, B., Purcell, S.M., 2012. INRICH: interval-based  
568 enrichment analysis for genome-wide association studies. *Bioinformatics* 28,  
569 1797–9.  
570
- 571 Lichtenstein, P., Yip, B.H., Björk, C., Pawitan, Y., Cannon, T.D., Sullivan, P.F.,  
572 Hultman, C.M., 2009. Common genetic determinants of schizophrenia and bipolar  
573 disorder in Swedish families: a population-based study. *Lancet* 373, 234–239.  
574
- 575 Lindblad-Toh, K., Garber, M., Zuk, O., Lin, M.F., Parker, B.J., Washietl, S.,  
576 Kheradpour, P., Ernst, J., Jordan, G., Mauceli, E., Ward, L.D., Lowe, C.B.,  
577 Holloway, A.K., Clamp, M., Gnerre, S., Alkhalidi, J., Beal, K., Chang, J., Clawson,  
578 H., Cuff, J., Di Palma, F., Fitzgerald, S., Flicek, P., Guttman, M., Hubisz, M.J.,  
579 Jaffe, D.B., Jungreis, I., Kent, W.J., Kostka, D., Lara, M., Martins, A.L.,  
580 Massingham, T., Moltke, I., Raney, B.J., Rasmussen, M.D., Robinson, J., Stark, A.,  
581 Vilella, A.J., Wen, J., Xie, X., Zody, M.C., Baldwin, J., Bloom, T., Whye Chin, C.,  
582 Heiman, D., Nicol, R., Nusbaum, C., Young, S., Wilkinson, J., Worley, K.C.,  
583 Kovar, C.L., Muzny, D.M., Gibbs, R. a., Cree, A., Dihm, H.H., Fowler, G.,  
584 Jhangiani, S., Joshi, V., Lee, S., Lewis, L.R., Nazareth, L.V., Okwuonu, G.,  
585 Santibanez, J., Warren, W.C., Mardis, E.R., Weinstock, G.M., Wilson, R.K.,  
586 Delehaunty, K., Dooling, D., Fronik, C., Fulton, L., Fulton, B., Graves, T., Minx,  
587 P., Sodergren, E., Birney, E., Margulies, E.H., Herrero, J., Green, E.D., Haussler,  
588 D., Siepel, A., Goldman, N., Pollard, K.S., Pedersen, J.S., Lander, E.S., Kellis, M.,  
589 2011. A high-resolution map of human evolutionary constraint using 29 mammals.  
590 *Nature* 478, 476–482.  
591
- 592 Locke, A.E., Kahali, B., Berndt, S.I., Justice, A.E., Pers, T.H., Day, F.R., Powell, C.,  
593 Vedantam, S., Buchkovich, M.L., Yang, J., et al., 2015. Genetic studies of body  
594 mass index yield new insights for obesity biology. *Nature* 518, 197–206.  
595
- 596 Markow, T.A., 2012. Developmental instability: its origins and evolutionary  
597 implications: proceedings of the International Conference on Developmental  
598 Instability: Its Origins and Evolutionary Implications, Tempe, Arizona, 14-15 June  
599 1993. Springer Science and Business Media.  
600

- 601 Mendizabal, I., Keller, T., Zeng, J., Soojin, V.Y., 2014. Epigenetics and evolution.  
602 *Integr. Comp. Biol.* 54, 31–42.  
603
- 604 Messias, E.L., Chen, C.-Y., Eaton, W.W., 2007. Epidemiology of schizophrenia:  
605 review of findings and myths. *Psychiatr. Clin. North Am.* 30, 323–38.  
606
- 607 Meyer, D., Aguiar, V.R., Bitarello, B.D., Brandt, D.Y., Nunes, K., 2017. A genomic  
608 perspective on HLA evolution. *Immunogenetics* 70, 1–23.  
609
- 610 Molaro, A., Hodges, E., Fang, F., Song, Q., McCombie, W.R., Hannon, G.J., Smith,  
611 A.D., 2011. Sperm methylation profiles reveal features of epigenetic inheritance  
612 and evolution in primates. *Cell* 146, 1029–1041.  
613
- 614 Nichols, C., 2009. Is there an evolutionary advantage of schizophrenia? *Pers. Individ.*  
615 *Diff.* 46, 832–838.  
616
- 617 Paaby, A.B., Rockman, M.V., 2014. Cryptic genetic variation: evolution’s hidden  
618 substrate. *Nat. Rev. Genet.* 15, 247–258  
619
- 620 Pollard, K.S., Salama, S.R., King, B., Kern, A.D., Dreszer, T., Katzman, S., Siepel,  
621 A., Pedersen, J.S., Bejerano, G., Baertsch, R., et al., 2006. Forces shaping the  
622 fastest evolving regions in the human genome. *PLoS Genet* 2, e168.  
623
- 624 Potts, W.K., Wakeland, E.K., 1990. Evolution of diversity at the major  
625 histocompatibility complex. *Trends Ecol. Evol. (Amst.)* 5, 181–7.  
626
- 627 Power, R.A., Kyaga, S., Uher, R., MacCabe, J.H., Långström, N., Landen, M.,  
628 McGuffin, P., Lewis, C.M., Lichtenstein, P., Svensson, A.C., 2013. Fecundity of  
629 patients with schizophrenia, autism, bipolar disorder, depression, anorexia nervosa,  
630 or substance abuse vs their unaffected siblings. *JAMA Psychiatry* 70, 22–30.  
631
- 632 Rannala, B., Yang, Z., 2003. Bayes estimation of species divergence times and  
633 ancestral population sizes using DNA sequences from multiple loci. *Genetics* 164,  
634 1645–1656.  
635
- 636 R Core Team, 2017. *R: A Language and Environment for Statistical Computing.*  
637 Vienna, Austria.  
638
- 639 Ripke, S., Neale, B.M., Corvin, A., Walters, J.T., Farh, K.-H., Holmans, P.A., Lee, P.,  
640 Bulik-Sullivan, B., Collier, D.A., Huang, H., et al., 2014. Biological insights from  
641 108 schizophrenia-associated genetic loci. *Nature* 511, 421–427.  
642
- 643 Rivera, C.M., Ren, B., 2013. Mapping human epigenomes. *Cell* 155, 39–55.  
644
- 645 Roberts, S.C., Gosling, L.M., Carter, V., Petrie, M., 2008. MHC-correlated odour  
646 preferences in humans and the use of oral contraceptives. *Proc. Biol. Sci.* 275,  
647 2715–2722.  
648
- 649 Santos, P.S.C., Schinemann, J.A., Gabardo, J., Bicalho, M. da G., 2005. New  
650 evidence that the MHC influences odor perception in humans: a study with 58



- 651 Southern Brazilian students. *Horm. Behav.* 47, 384–388.
- 652
- 653 Schork, A.J., Thompson, W.K., Pham, P., Torkamani, A., Roddey, J.C., Sullivan,  
654 P.F., Kelsoe, J.R., O'Donovan, M.C., Furberg, H., Schork, N.J., et al., 2013. All  
655 SNPs are not created equal: genome-wide association studies reveal a consistent  
656 pattern of enrichment among functionally annotated SNPs. *PLoS Genet* 9,  
657 e1003449.
- 658
- 659 Schork, A.J., Wang, Y., Thompson, W.K., Dale, A.M., Andreassen, O.A., 2016. New  
660 statistical approaches exploit the polygenic architecture of schizophrenia—  
661 implications for the underlying neurobiology. *Curr. Opin. Neurobiol.* 36, 89–98.
- 662
- 663 Sekar, A., Bialas, A.R., de Rivera, H., Davis, A., Hammond, T.R., Kamitaki, N.,  
664 Tooley, K., Presumey, J., Baum, M., Van Doren, V., et al., 2016. Schizophrenia  
665 risk from complex variation of complement component 4. *Nature* 530, 177–183.
- 666
- 667 Sklar, P., Ripke, S., Scott, L.J., Andreassen, O.A., Cichon, S., Craddock, N.,  
668 Edenberg, H.J., Nurnberger, J.I., Rietschel, M., Blackwood, D., et al., 2011. Large-  
669 scale genome-wide association analysis of bipolar disorder identifies a new  
670 susceptibility locus near ODZ4. *Nature Genet.* 43, 977–983.
- 671
- 672 Skre, I., Onstad, S., Torgersen, S., Lygren, S., Kringlen, E., 1993. A twin study of  
673 DSM-III-R anxiety disorders. *Acta Psychiatr. Scand.* 88, 85–92.
- 674
- 675 Sniekers, S., Stringer, S., Watanabe, K., Jansen, P.R., Coleman, J.R., Krapohl, E.,  
676 Taskesen, E., Hammerschlag, A.R., Okbay, A., Zabaneh, D., et al., 2017. Genome-  
677 wide association meta-analysis of 78,308 individuals identifies new loci and genes  
678 influencing human intelligence. *Nature Genet.* 49, 1107–1112.
- 679
- 680 Sommer, S., 2005. The importance of immune gene variability (MHC) in  
681 evolutionary ecology and conservation. *Front. Zool.* 2, 16.
- 682
- 683 Srinivasan, S., Bettella, F., Hassani, S., Wang, Y., Witoelar, A., Schork, A.J.,  
684 Thompson, W.K., Collier, D.A., Desikan, R.S., Melle, I., et al., 2017. Probing the  
685 association between early evolutionary markers and schizophrenia. *PLoS One* 12,  
686 e0169227.
- 687
- 688 Srinivasan, S., Bettella, F., Mattingsdal, M., Wang, Y., Witoelar, A., Schork, A.J.,  
689 Thompson, W.K., Zuber, V., Winsvold, B.S., Zwart, J.-A., et al., 2015. Genetic  
690 markers of human evolution are enriched in schizophrenia. *Biol. Psychiatry* 80,  
691 284–292.
- 692
- 693 Stahl, E.A., Raychaudhuri, S., Remmers, E.F., Xie, G., Eyre, S., Thomson, B.P., Li,  
694 Y., Kurreeman, F.A., Zhernakova, A., Hinks, A., et al., 2010. Genome-wide  
695 association study meta-analysis identifies seven new rheumatoid arthritis risk loci.  
696 *Nature Genet.* 42, 508–514.
- 697
- 698 Sullivan, P.F., Kendler, K.S., Neale, M.C., 2003. Schizophrenia as a complex trait:  
699 evidence from a meta-analysis of twin studies. *Arch. Gen. Psychiatry* 60, 1187–

700 1192.

701

702 Teslovich, T.M., Musunuru, K., Smith, A.V., Edmondson, A.C., Stylianou, I.M.,  
703 Koseki, M., Pirruccello, J.P., Ripatti, S., Chasman, D.I., Willer, C.J., Johansen,  
704 C.T., Fouchier, S.W., Isaacs, A., Peloso, G.M., Barbalic, M., Ricketts, S.L., Bis,  
705 J.C., Aulchenko, Y.S., Thorleifsson, G., Feitosa, M.F., Chambers, J., Orho-  
706 Melander, M., Melander, O., Johnson, T., Li, X., Guo, X., Li, M., Shin Cho, Y., Jin  
707 Go, M., Jin Kim, Y., Lee, J.-Y., Park, T., Kim, K., Sim, X., Twee-Hee Ong, R.,  
708 Croteau-Chonka, D.C., Lange, L.A., Smith, J.D., Song, K., Hua Zhao, J., Yuan, X.,  
709 Luan, J., Lamina, C., Ziegler, A., Zhang, W., Zee, R.Y.L., Wright, A.F., Witteman,  
710 J.C.M., Wilson, J.F., Willemsen, G., Wichmann, H.-E., Whitfield, J.B.,  
711 Waterworth, D.M., Wareham, N.J., Waeber, G., Vollenweider, P., Voight, B.F.,  
712 Vitart, V., Uitterlinden, A.G., Uda, M., Tuomilehto, J., Thompson, J.R., Tanaka,  
713 T., Surakka, I., Stringham, H.M., Spector, T.D., Soranzo, N., Smit, J.H., Sinisalo,  
714 J., Silander, K., Sijbrands, E.J.G., Scuteri, A., Scott, J., Schlessinger, D., Sanna, S.,  
715 Salomaa, V., Saharinen, J., Sabatti, C., Ruukonen, A., Rudan, I., Rose, L.M.,  
716 Roberts, R., Rieder, M., Psaty, B.M., Pramstaller, P.P., Pichler, I., Perola, M.,  
717 Penninx, B.W.J.H., Pedersen, N.L., Pattaro, C., Parker, A.N., Pare, G., Oostra,  
718 B.A., O'Donnell, C.J., Nieminen, M.S., Nickerson, D.A., Montgomery, G.W.,  
719 Meitinger, T., McPherson, R., McCarthy, M.I., McArdle, W., Masson, D., Martin,  
720 N.G., Marroni, F., Mangino, M., Magnusson, P.K.E., Lucas, G., Luben, R., Loos,  
721 R.J.F., Lokki, M.-L., Lettre, G., Langenberg, C., Launer, L.J., Lakatta, E.G.,  
722 Laaksonen, R., Kyvik, K.O., Kronenberg, F., König, I.R., Khaw, K.-T., Kaprio, J.,  
723 Kaplan, L.M., Johansson, A., Jarvelin, M.-R., Janssens, A.C.J.W., Ingelsson, E.,  
724 Igl, W., Kees Hovingh, G., Hottenga, J.-J., Hofman, A., Hicks, A.A.,  
725 Hengstenberg, C., Heid, I.M., Hayward, C., Havulinna, A.S., Hastie, N.D., Harris,  
726 T.B., Haritunians, T., Hall, A.S., Gyllensten, U., Guiducci, C., Groop, L.C.,  
727 Gonzalez, E., Gieger, C., Freimer, N.B., Ferrucci, L., Erdmann, J., Elliott, P.,  
728 Ejebe, K.G., Döring, A., Dominiczak, A.F., Demissie, S., Deloukas, P., de Geus,  
729 E.J.C., de Faire, U., Crawford, G., Collins, F.S., Chen, Y.I., Caulfield, M.J.,  
730 Campbell, H., Burt, N.P., Bonnycastle, L.L., Boomsma, D.I., Boehholdt, S.M.,  
731 Bergman, R.N., Barroso, I., Bandinelli, S., Ballantyne, C.M., Assimes, T.L.,  
732 Quertermous, T., Altshuler, D., Seielstad, M., Wong, T.Y., Tai, E.-S., Feranil,  
733 A.B., Kuzawa, C.W., Adair, L.S., Taylor, H.A., Borecki, I.B., Gabriel, S.B.,  
734 Wilson, J.G., Holm, H., Thorsteinsdottir, U., Gudnason, V., Krauss, R.M., Mohlke,  
735 K.L., Ordovas, J.M., Munroe, P.B., Kooner, J.S., Tall, A.R., Hegele, R.A.,  
736 Kastelein, J.J.P., Schadt, E.E., Rotter, J.I., Boerwinkle, E., Strachan, D.P., Mooser,  
737 V., Stefansson, K., Reilly, M.P., Samani, N.J., Schunkert, H., Cupples, L.A.,  
738 Sandhu, M.S., Ridker, P.M., Rader, D.J., van Duijn, C.M., Peltonen, L., Abecasis,  
739 G.R., Boehnke, M., Kathiresan, S., 2010. Biological, clinical and population  
740 relevance of 95 loci for blood lipids. *Nature* 466, 707–713.

741

742 Traherne, J., 2008. Human MHC architecture and evolution: implications for disease  
743 association studies. *Int. J. Immunogenet.* 35, 179–192.

744

745 Venter, J.C., Adams, M.D., Myers, E.W., Li, P.W., Mural, R.J., Sutton, G.G., Smith,  
746 H.O., Yandell, M., Evans, C.A., Holt, R.A., et al., 2001. The sequence of the  
747 human genome. *Science* 291, 1304–1351.

748

- 749 WHO, 1973. Report of the international pilot study of schizophrenia.  
750
- 751 Winternitz, J., Abbate, J., Huchard, E., Havl'ivcek, J., Garamszegi, L., 2017.  
752 Patterns of MHC-dependent mate selection in humans and nonhuman primates: a  
753 meta-analysis. *Molecular ecology* 26, 668–688.  
754
- 755 Wood, A.R., Esko, T., Yang, J., Vedantam, S., Pers, T.H., Gustafsson, S., Chu, A.Y.,  
756 Estrada, K., Luan, J., Kutalik, Z., et al., 2014. Defining the role of common  
757 variation in the genomic and biological architecture of adult human height. *Nature*  
758 *Genet* 46, 1173–1186.  
759
- 760 Xu, K., Schadt, E.E., Pollard, K.S., Roussos, P., Dudley, J.T., 2015. Genomic and  
761 network patterns of schizophrenia genetic variation in human evolutionary  
762 accelerated regions. *Mol Biol Evol* 32, 1148–1160.  
763  
764
- 765
- 766
- 767

768 **Figure legends**

769 **Fig. 1: Enrichment plots of hypo-DMR and hyper-DMR SNPs in schizophrenia**

770 Quantile-quantile (QQ) plots of GWAS SNPs for Schizophrenia (SCZ) with the  
771 extended MHC region (chr6: 25-35Mb) unmasked (A) and masked (B). Expected -  
772  $\log_{10} p$ -values under the null hypothesis are shown on the X-axis. Observed  $-\log_{10} p$ -  
773 values are on the Y-axis. The values for all GWAS SNPs are plotted in dark green  
774 while the values for SNPs in linkage disequilibrium (LD) with hypo-methylated  
775 DMRs are plotted in blue and SNPs in LD with hyper-methylated DMRs are plotted  
776 in pink. A leftward deflection of the plotted  $p$ -values from the line for all GWAS  
777 SNPs indicates enrichment of true signals – the greater the leftward deflection, the  
778 stronger the enrichment. Genomic correction was performed on all SNPs with global  
779 lambda.

780

781 **Fig. 2: Enrichment plots of hypo-DMR and hyper-DMR SNPs across**  
782 **multiple traits**

783 Thirteen different GWASs were analysed using a common set of ~2.4 million  
784 SNPs. The  $p$ -values for the common set of GWAS SNPs are plotted in dark  
785 green;  $p$ -values for SNPs that tag hypo-methylated DMRs are plotted in blue;  
786 and  $p$ -values for SNPs that tag hyper-methylated DMRs are plotted in pink.  
787 ADHD, attention deficit hyperactivity disorder; BMI, body mass index; BPD,  
788 bipolar disorder; DBP, diastolic blood pressure; HDL, high density lipoprotein;  
789 LDL, low density lipoprotein; RA, rheumatoid arthritis; SBP, systolic blood  
790 pressure; SCZ, schizophrenia; TC, total cholesterol; TG, triglycerides. The  
791 MHC region was absent from the common set of SNPs.

792

793 **Fig. 3: INRICH test for enrichment of association of DMR gene sets and NSS**

794 **genes with SCZ, MHC masked**

795 A visual heatmap depicting *p*-values from bootstrapping with 5,000 iterations. The  
796 various evolutionary annotations compared are as follows. HypoDMR – human hypo-  
797 methylated DMRs; HyperDMR – human hyper-methylated DMRs. HypoDMR and  
798 HyperDMR were taken from the study by Hernando-Herraez et al. (2013). dmrH –  
799 human-specific DMRs (Gokhman et al, 2014), which are referred to as non-primate  
800 DMRs in this manuscript. NSS - Neanderthal selective sweep. Datasets marked with \*  
801 have been previously reported by Banerjee et al. (2017) and are presented here for  
802 comparison only.

803

804

**Figure 1**

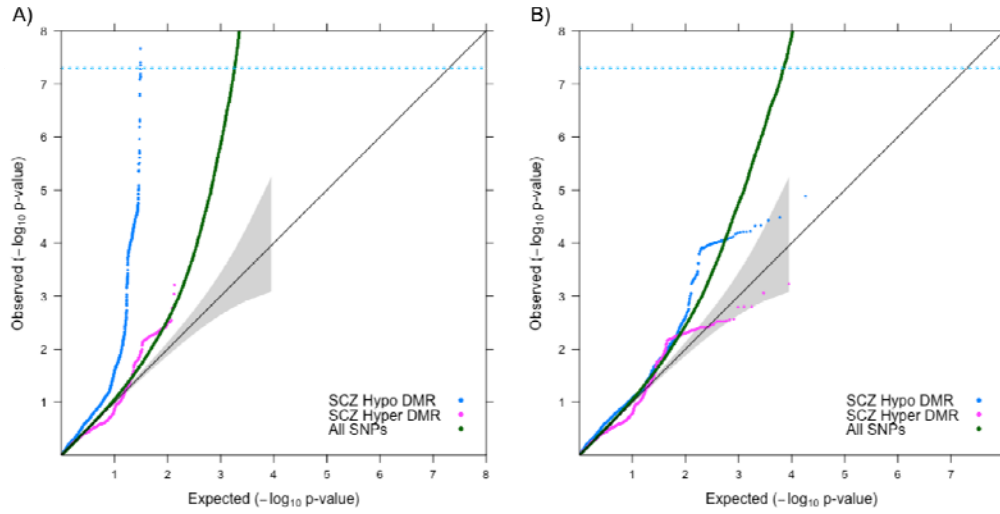

**Figure 2**

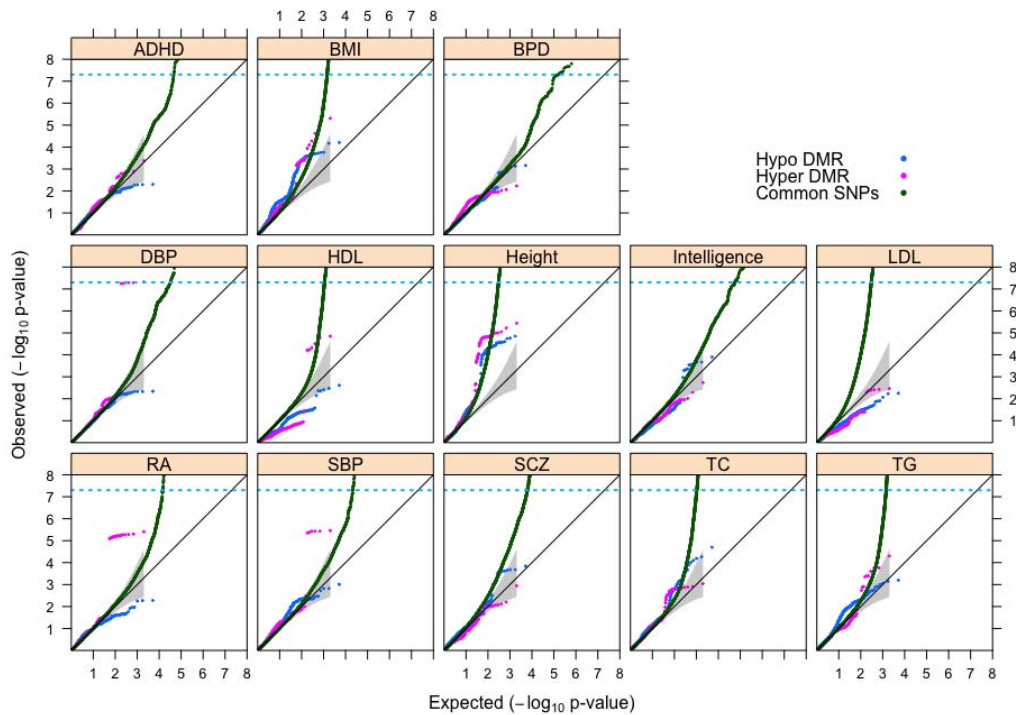

**Figure 3**

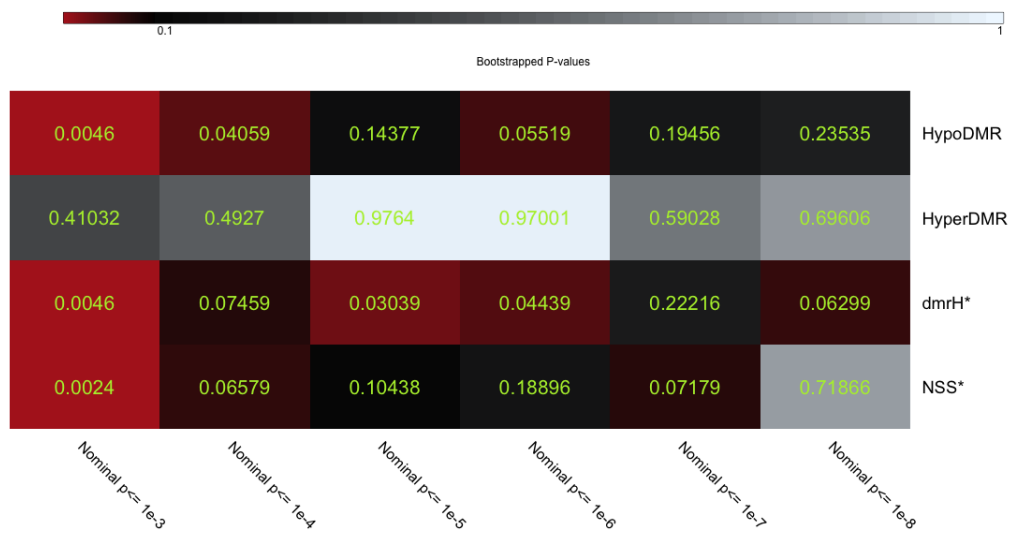

Source: http://biorxiv.org/content/10.1101/322693v2.full.pdf
